# Supplementary material for: Role of the Vibriolysin VemA Secreted by the Emergent Pathogen Vibrio europaeus in the Colonization of Manila Clam Mucus
Source: MDPI journal article supplement (doi:10.3390/microorganisms10122475), 2022-12-15
Supplement: s1 [file s1]

**Table S1.** *V. europaeus* strains/genomes used in this study.

| Strain:                | Source:                                                                                   | Isolation mortalities: | Location:                                           | Date:         | Reference:                               | Assembly        |
|------------------------|-------------------------------------------------------------------------------------------|------------------------|-----------------------------------------------------|---------------|------------------------------------------|-----------------|
| PP-654                 | Flat oyster larvae ( <i>Ostrea edulis</i> )                                               | Y                      | Hatchery CIMA (Ribadeo; Galicia, Spain)             | March/2001    | Prado et al. [9]                         | -               |
| PP-660                 | Flat oyster larvae ( <i>Ostrea edulis</i> )                                               | Y                      | Hatchery CIMA (Ribadeo; Galicia, Spain)             | March/2001    | Prado et al. [9]                         | -               |
| PP-635                 | Seawater tank; Flat oyster larvae ( <i>Ostrea edulis</i> )                                | Y                      | Hatchery CIMA (Ribadeo; Galicia, Spain)             | March/2001    | Prado et al. [9]                         | -               |
| CECT 8136 (PP-638)     | Seawater tank; Flat oyster larvae ( <i>Ostrea edulis</i> )                                | Y                      | Hatchery CIMA (Ribadeo; Galicia, Spain)             | March/2001    | Saulnier et al. [7] / Travers et al. [8] | GCA_001695575.1 |
| 04/002 1T2 (CECT 8427) | Abalone spat ( <i>Haliotis tuberculata</i> )                                              | Y                      | Hatchery (Cotentin; Normandy, France)               | January/2004  | Saulnier et al. [7] / Travers et al. [8] | -               |
| 07/118 T2 (CECT 8426)  | Pacific oyster spat ( <i>Crassostrea gigas</i> )                                          | Y                      | Hatchery (La Tremblade; Nouvelle-Aquitaine, France) | June/2007     | Saulnier et al. [7] / Travers et al. [8] | GCA_015654285.1 |
| 07/038 2T2             | Pacific oyster spat ( <i>Crassostrea gigas</i> )                                          | Y                      | Hatchery (La Tremblade; Nouvelle-Aquitaine, France) | August/2007   | Saulnier et al. [7] / Travers et al. [8] | -               |
| 07/108 T1              | Pacific oyster spat ( <i>Crassostrea gigas</i> )                                          | Y                      | Hatchery (La Tremblade; Nouvelle-Aquitaine, France) | August/2007   | Travers et al. [8]                       | -               |
| 07/110 T1              | Pacific oyster spat ( <i>Crassostrea gigas</i> )                                          | Y                      | Hatchery (La Tremblade; Nouvelle-Aquitaine, France) | August/2007   | Saulnier et al. [7] / Travers et al. [8] | -               |
| 07/112 T1              | Pacific oyster spat ( <i>Crassostrea gigas</i> )                                          | Y                      | Hatchery (La Tremblade; Nouvelle-Aquitaine, France) | August/2007   | Travers et al. [8]                       | -               |
| 07/115 T2              | ?                                                                                         | ?                      | ?                                                   | ?/2007        | -                                        | -               |
| 07/116 T1              | Pacific oyster spat ( <i>Crassostrea gigas</i> )                                          | Y                      | Hatchery (La Tremblade; Nouvelle-Aquitaine, France) | August/2007   | Travers et al. [8]                       | -               |
| 07/117 T1              | Pacific oyster spat ( <i>Crassostrea gigas</i> )                                          | Y                      | Hatchery (La Tremblade; Nouvelle-Aquitaine, France) | August/2007   | Saulnier et al. [7] / Travers et al. [8] | -               |
| 07/120 T1              | Pacific oyster spat ( <i>Crassostrea gigas</i> )                                          | Y                      | Hatchery (La Tremblade; Nouvelle-Aquitaine, France) | August/2007   | Travers et al. [8]                       | -               |
| 07/121 1T1             | ?                                                                                         | ?                      | ?                                                   | ?/2007        | -                                        | -               |
| PP2-843                | Manila clam spat (early spat $\geq 1000 \mu\text{m}$ ) ( <i>Ruditapes philippinarum</i> ) | Y                      | Hatchery Oestreira (Barizo; Galicia, Spain)         | November/2008 | Prado et al. [9]                         | -               |
| PP2-978                | Manila clam spat (early spat $\geq 1000 \mu\text{m}$ ) ( <i>Ruditapes philippinarum</i> ) | Y                      | Hatchery Oestreira (Barizo; Galicia, Spain)         | November/2008 | Prado et al. [9]                         | -               |
| 2909                   | Seawater tank; Carpet shell clam larvae ( <i>Ruditapes decussatus</i> )                   | Y                      | Hatchery CIMA (Ribadeo; Galicia, Spain)             | May/2011      | Dubert et al. [10]                       | -               |
| 2895                   | Seawater tank; Carpet shell clam larvae ( <i>Ruditapes decussatus</i> )                   | Y                      | Hatchery CIMA (Ribadeo; Galicia, Spain)             | May/2011      | Dubert et al. [10]                       | -               |
| 2930                   | Carpet shell clam larvae ( <i>Ruditapes decussatus</i> )                                  | Y                      | Hatchery CIMA (Ribadeo; Galicia, Spain)             | May/2011      | Dubert et al. [10]                       | -               |
| 2951                   | Carpet shell clam larvae ( <i>Ruditapes decussatus</i> )                                  | Y                      | Hatchery CIMA (Ribadeo; Galicia, Spain)             | May/2011      | Dubert et al. [10]                       | -               |
| 2945                   | Seawater tank; Carpet shell clam larvae ( <i>Ruditapes decussatus</i> )                   | Y                      | Hatchery CIMA (Ribadeo; Galicia, Spain)             | May/2011      | Dubert et al. [10]                       | -               |
| 2967                   | Carpet shell clam larvae ( <i>Ruditapes decussatus</i> )                                  | Y                      | Hatchery CIMA (Ribadeo; Galicia, Spain)             | May/2011      | Dubert et al. [10]                       | -               |
| 2968                   | Seawater tank; Carpet shell clam larvae ( <i>Ruditapes decussatus</i> )                   | Y                      | Hatchery CIMA (Ribadeo; Galicia, Spain)             | May/2011      | Dubert et al. [10]                       | -               |
| 2969                   | Carpet shell clam larvae ( <i>Ruditapes decussatus</i> )                                  | Y                      | Hatchery CIMA (Ribadeo; Galicia, Spain)             | May/2011      | Dubert et al. [10]                       | -               |
| 2971                   | Seawater tank; Carpet shell clam larvae ( <i>Ruditapes decussatus</i> )                   | Y                      | Hatchery CIMA (Ribadeo; Galicia, Spain)             | May/2011      | Dubert et al. [10]                       | -               |

|         |                                                                         |   |                                             |               |                      |                 |
|---------|-------------------------------------------------------------------------|---|---------------------------------------------|---------------|----------------------|-----------------|
| 2974    | Carpet shell clam larvae ( <i>Ruditapes decussatus</i> )                | Y | Hatchery CIMA (Ribadeo; Galicia, Spain)     | May/2011      | Dubert et al. [10]   | -               |
| 2975    | Seawater tank; Carpet shell clam larvae ( <i>Ruditapes decussatus</i> ) | Y | Hatchery CIMA (Ribadeo; Galicia, Spain)     | May/2011      | Dubert et al. [10]   | -               |
| 3454    | Wedge clam larvae ( <i>Donax trunculus</i> )                            | Y | Hatchery CIMA (Ribadeo; Galicia, Spain)     | May/2012      | -                    | -               |
| 3492    | Seawater tank; Wedge clam larvae ( <i>Donax trunculus</i> )             | Y | Hatchery CIMA (Ribadeo; Galicia, Spain)     | June/2012     | -                    | -               |
| 3610    | Carpet shell clam broodstock ( <i>Ruditapes decussatus</i> )            | N | Hatchery CIMA (Ribadeo; Galicia, Spain)     | July/2012     | Dubert et al. [16]   | -               |
| 3614    | Carpet shell clam eggs ( <i>Ruditapes decussatus</i> )                  | N | Hatchery CIMA (Ribadeo; Galicia, Spain)     | July/2012     | Dubert et al. [16]   | -               |
| NPI1    | Peruvian scallop larvae ( <i>Argopecten purpuratus</i> )                | Y | Hatchery Invertec Ostimar (Coquimbo, Chile) | February/2015 | Rojas et al. [11]    | GCA 013154935.1 |
| 071316F | Seawater                                                                | N | Netarts Bay (Oregon, US)                    | July/2016     | Rojas et al. [11]    | GCA 013114045.1 |
| L2      | Banded carpet shell larvae ( <i>Polittapes rhomboides</i> )             | Y | Hatchery CIMA (Ribadeo; Galicia, Spain)     | March/2018    | -                    | -               |
| L3      | Razor shell clam larvae ( <i>Ensis arcuatus</i> )                       | Y | Hatchery CIMA (Ribadeo; Galicia, Spain)     | March/2018    | -                    | -               |
| L4      | Razor shell clam larvae ( <i>Ensis arcuatus</i> )                       | Y | Hatchery CIMA (Ribadeo; Galicia, Spain)     | March/2018    | -                    | -               |
| L20     | Manila clam larvae ( <i>Ruditapes philippinarum</i> )                   | Y | Hatchery CIMA (Ribadeo; Galicia, Spain)     | May/2018      | -                    | -               |
| EX1     | Flat oyster larvae ( <i>Ostrea edulis</i> )                             | Y | Hatchery Ostreira (Arousa; Galicia, Spain)  | July/1985     | Lodeiros et al. [15] | -               |

**Table S2.** Primers used in this study.

| Use                                                           | Name               | Sequence 5'-3'                                          | Reference           |
|---------------------------------------------------------------|--------------------|---------------------------------------------------------|---------------------|
| Construction of recombinant plasmid pPC1:                     | F1 PC1 f           | agcttgatctcggaattcctgcagcaatcgtagtttagacag              | This study          |
|                                                               | F1 PC1 r           | tcaagcttttagtgcacgccagattggttcattattcttctg              | This study          |
|                                                               | F2 PC1 f           | ggagtttctacaataacaggaaagaataatgaaccaatctgcgctgacactaaag | This study          |
|                                                               | F2 PC1 r           | cataattggtaacgaatcagacaattcaaaccttcaagtaactgctg         | This study          |
|                                                               | pSW PC1 for        | cagcagttactgaaggttgattgtctgattcgttaccattatg             | This study          |
|                                                               | pSW PC1 rev        | ctgtctaaactaacgattgctgcaggaaattcgatatcaagc              | This study          |
| Primers for plasmid sequencing:                               | seq F1 PC1 f       | gcaatcgtagtttagaca                                      | This study          |
|                                                               | seq F1 PC1 r       | tgggttcattattcttctg                                     | This study          |
|                                                               | seq F2 PC1 f       | ctggcgtgacactaaag                                       | This study          |
|                                                               | seq F2 PC1 r       | caaaccttcaagtaactgctg                                   | This study          |
| Verification of the first allelic exchange after conjugation: | Check1 ins pSW for | cgggcaggataggtgaagtag                                   | Hussain et al. [29] |
|                                                               | Check1 ins pSW rev | gagtttcgtgccggttctg                                     | Hussain et al. [29] |
| Verification of the second allelic exchange:                  | check mut PC1 f    | tcgaacccacctaagatagc                                    | This study          |
|                                                               | check mut PC1 r    | agaggccaatcggaacagg                                     | This study          |

**Table S3.** Identities (%) obtained from interspecific homology search.

| Protein                     | Specie                    | No. Accession | Identity (%) |
|-----------------------------|---------------------------|---------------|--------------|
| M4 family metalloproteinase | <i>V. tubiashii</i>       | WP 004744606  | 97.04        |
| M4 family metalloproteinase | <i>V. crassostreae</i>    | WP 069597287  | 83.76        |
| M4 family metalloproteinase | <i>V. gigantis</i>        | WP 215408368  | 79.74        |
| Vsm*                        | <i>V. splendidus</i>      | ABJ90450      | 79.57        |
| VtpA*                       | <i>V. coralliilyticus</i> | ACD87449      | 75.16        |
| VcpA*                       | <i>V. coralliilyticus</i> | AFK08684      | 74.84        |
| VnpA*                       | <i>V. neptunius</i>       | MBN3580162    | 72.95        |
| M4 family metalloproteinase | <i>V. pectenica</i>       | WP 125321186  | 72.46        |
| M4 family metalloproteinase | <i>V. ostreica</i>        | WP 076589241  | 72.37        |
| EmpA*                       | <i>V. anguillarum</i>     | WP 094163326  | 69.74        |
| HapA*                       | <i>V. cholerae</i>        | WP 000782181  | 67.38        |
| M4 family metalloproteinase | <i>S. kushneri</i>        | WP 077673443  | 64.43        |
| M4 family metalloproteinase | <i>P. halotolerans</i>    | WP 027253425  | 63.95        |

Asterisks indicate homologous genes in which its role in virulence was studied and published.
